# Supplementary material for: High-throughput identification of prefusion-stabilizing mutations in SARS-CoV-2 spike
Source: PubMed Central journal article supplement (PMC10086000; doi:10.1038/s41467-023-37786-1), 2023-04-10
Supplement: 41467_2023_37786_MOESM1_ESM.pdf [file 41467_2023_37786_MOESM1_ESM.pdf]

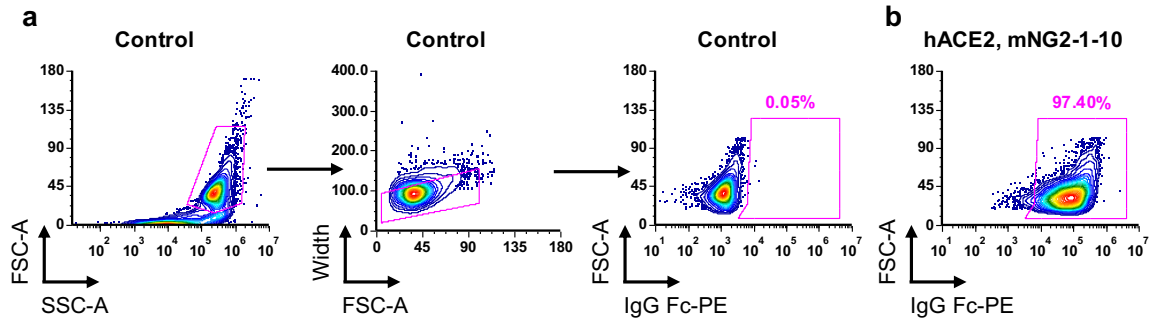

**Fig. S1 | Validation of hACE2, mNG2<sub>1-10</sub>-expressing cell line.** a,b, Flow cytometry plots showing (a) untransfected control and gating strategy in this verification experiment, and (b) surface expression of hACE2 in HEK293T landing pad cells. Primary antibody used was S RBD with an Fc tag.

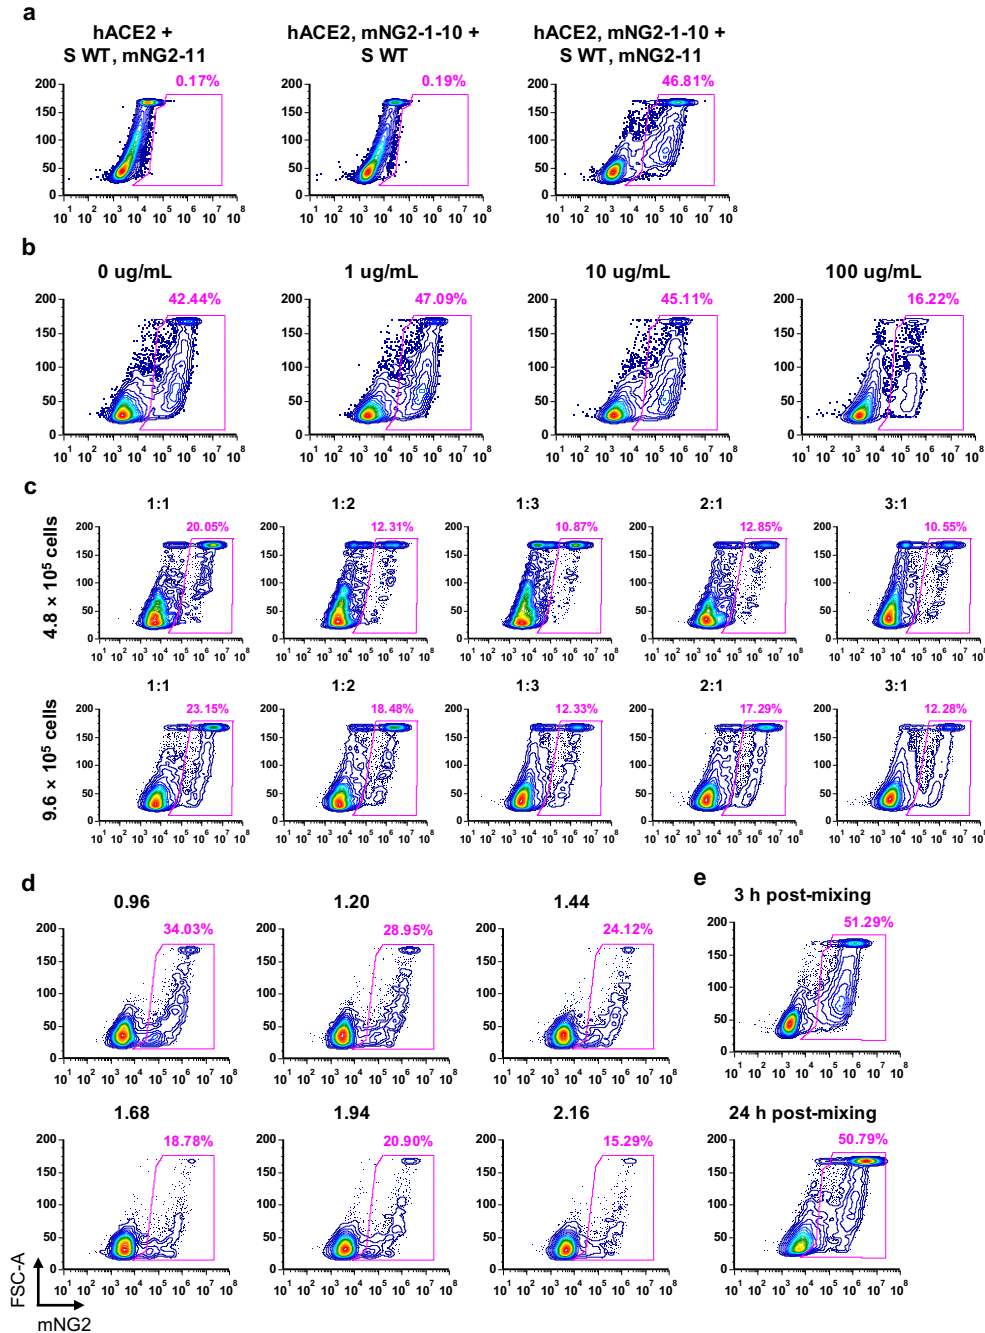

**Fig. S2 | Validation and optimization of fusion assay.** **a**, Flow cytometry plots of fusion assay between hACE2- and S-expressing cells showing detectable green fluorescence when both mNG2<sub>1-10</sub> and mNG2<sub>11</sub> were expressed, and negligible fluorescent background signal when either mNG2<sub>1-10</sub> or mNG2<sub>11</sub> was expressed. **b**, Addition of CC40.8<sup>1</sup>, a neutralizing antibody targeting the stem helix, to S, mNG2<sub>11</sub>-expressing cells one hour prior to mixing with hACE2, mNG2<sub>1-10</sub>-expressing cells decreased fusion events. Antibody concentration is indicated above each plot. **c**, Optimization of the ratio between hACE2, mNG2<sub>1-10</sub>- and S, mNG2<sub>11</sub>-expressing cells for fusion

assay. Total cell number in co-culture is indicated, and the ratio of hACE2, mNG2<sub>1-10</sub><sup>-</sup> to S, mNG2<sub>11</sub>-expressing cells is shown above each plot. **d**, Optimization of total cell numbers of hACE2, mNG2<sub>1-10</sub><sup>-</sup> and S, mNG2<sub>11</sub>-expressing cells for fusion assay. Total cell number, in millions, of hACE2, mNG2<sub>1-10</sub><sup>-</sup> and S, mNG2<sub>11</sub>-expressing cells in co-culture is shown above each plot. Equal numbers of hACE2, mNG2<sub>1-10</sub><sup>-</sup> and S, mNG2<sub>11</sub>-expressing cells were co-cultured for 3 hours. **e**, Optimization of time point for fusion sorting. Equal numbers of hACE2, mNG2<sub>1-10</sub><sup>-</sup> and S, mNG2<sub>11</sub>-expressing cells totaling  $5.0 \times 10^5$  cells/mL were mixed and analyzed via flow cytometry at the indicated time point. Fig. S11b shows the gating strategy for optimization experiments.

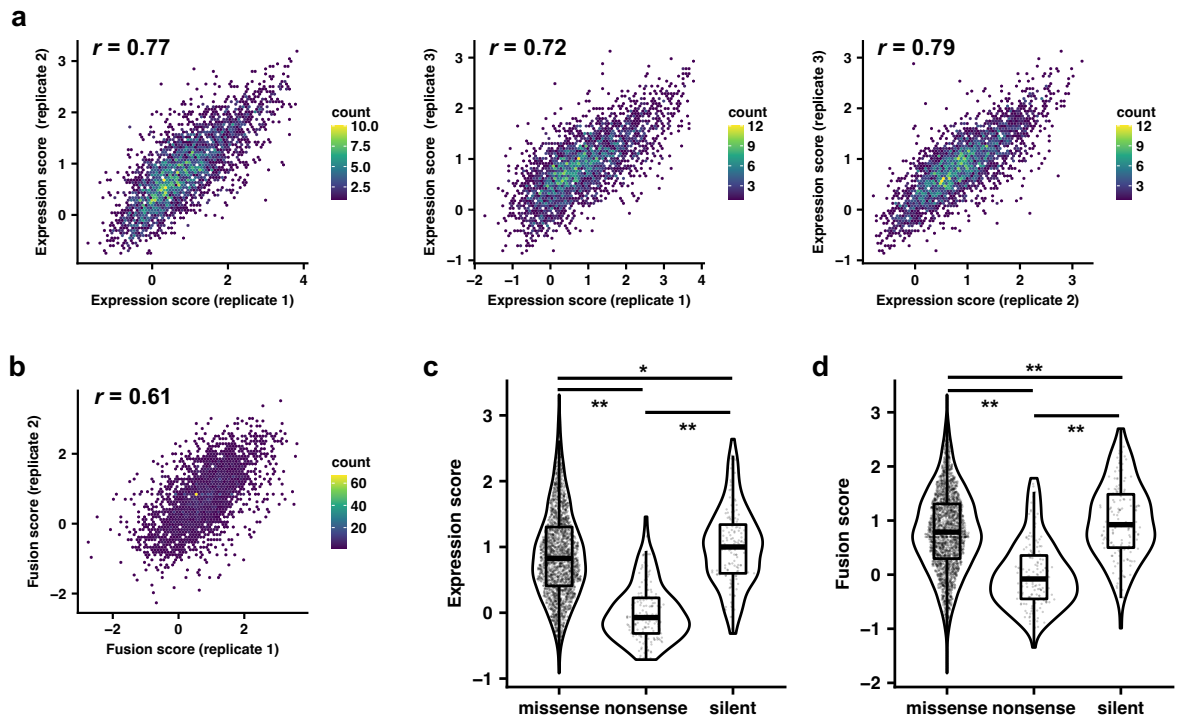

**Fig. S3 | Additional analyses for expression and fusion assays.** **a,b**, Correlation of expression scores **(a)** and fusion scores **(b)** between replicates. Pearson correlation coefficient,  $r$ , is shown for each plot. **c,d**, Violin plots of expression scores **(c)** and fusion scores **(d)** of missense, nonsense, and silent mutations are compared. Box-and-whisker plots are also shown. The center corresponds to the mean, bounds of box represent first and third quartiles, and whiskers extend to the 5<sup>th</sup> and 95<sup>th</sup> percentiles. \*,  $p < 0.05$ ; \*\*,  $p < 0.001$ . Exact  $p$ -values from two-sided  $t$  tests are shown in Table S6. Expression and fusion scores are averages from  $n = 2$  independent biological replicates. Data are plotted from Supplementary Data 1.





lower fusion score suggests fusogenicity is impaired. Abbreviations of amino acid residues are as follows: A, alanine; C, cysteine; D, aspartic acid; E, glutamic acid; F, phenylalanine; G, glycine; H, histidine; I, isoleucine; K, lysine; L, leucine; M, methionine; N, asparagine; P, proline; Q, glutamine; R, arginine; S, serine; T, threonine; V, valine; W, tryptophan; Y, tyrosine. Data are plotted from Supplementary Data 1.

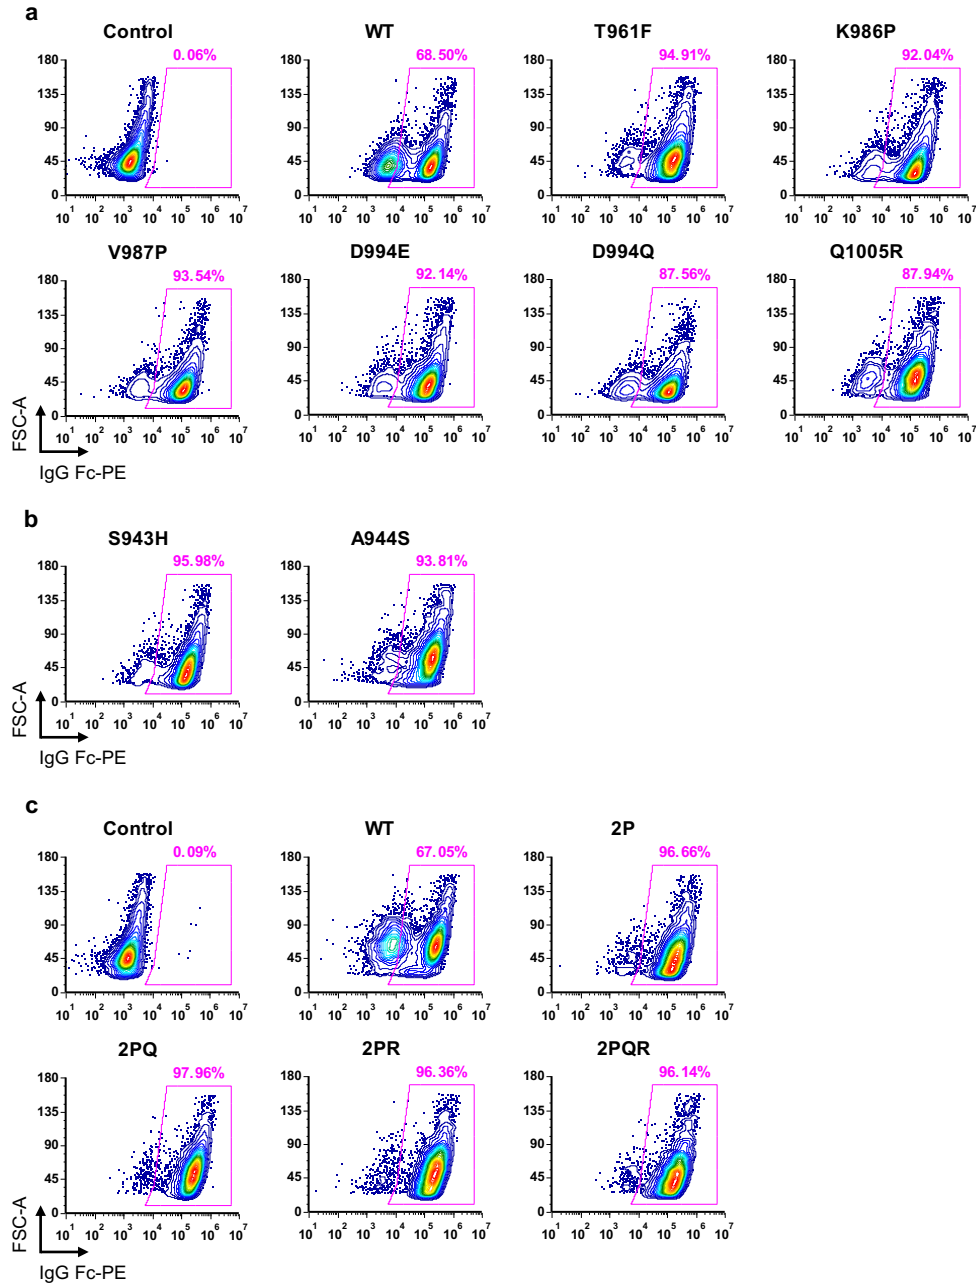

**Fig. S5 | Validation of surface expression of mutants of interest. a-c,** Flow cytometry plots showing surface expression of candidate prefusion-stabilizing mutations (**a**), fusion-enhancing mutations (**b**), and combinations of candidate prefusion-stabilizing mutations (**c**). Plots are representative of  $n = 3$  independent replicates. Abbreviations for combinatorial mutations are as follows: 2P, K986P/V987P; 2PQ, K986P/V987P/D994Q; 2PR, K986P/V987P/Q1005R; 2PQR, K986P/V987P/D994Q/Q1005R. Fig. S11a shows the gating strategy for this experiment.

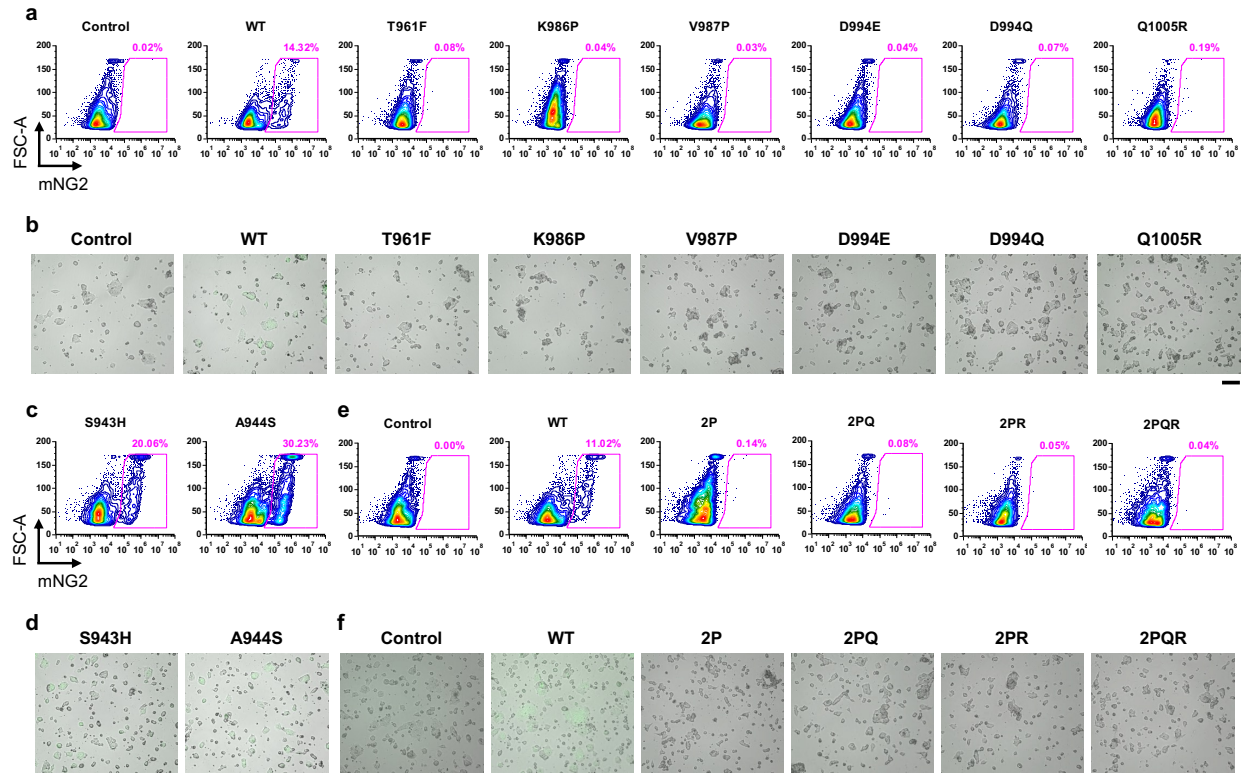

**Fig. S6 | Fusion activity of mutants of interest. a,b**, Flow cytometry plots (**a**) and micrographs (**b**) of S-expressing cells with fusion-incompetent mutations at 3 hours post-mixing with hACE2-expressing cells. **c,d**, Flow cytometry plots (**c**) and micrographs (**d**) of S-expression cells with fusion-enhancing mutations at 3 post-mixing with hACE2-expressing cells. **e,f**, Flow cytometry plots (**e**) and micrographs (**f**) of S-expression cells with combinations of fusion-incompetent mutations at 3 hours post-mixing with hACE2-expressing cells. Plots and micrographs are representative of  $n = 2$  independent replicates. Abbreviations of combinatorial mutations are as follows: 2P, K986P/V987P; 2PQ, K986P/V987P/D994Q; 2PR, K986P/V987P/Q1005R; 2PQR, K986P/V987P/D994Q/Q1005R. Scale bar: 100  $\mu\text{m}$ . Fig. S11b shows the gating strategy for this experiment.

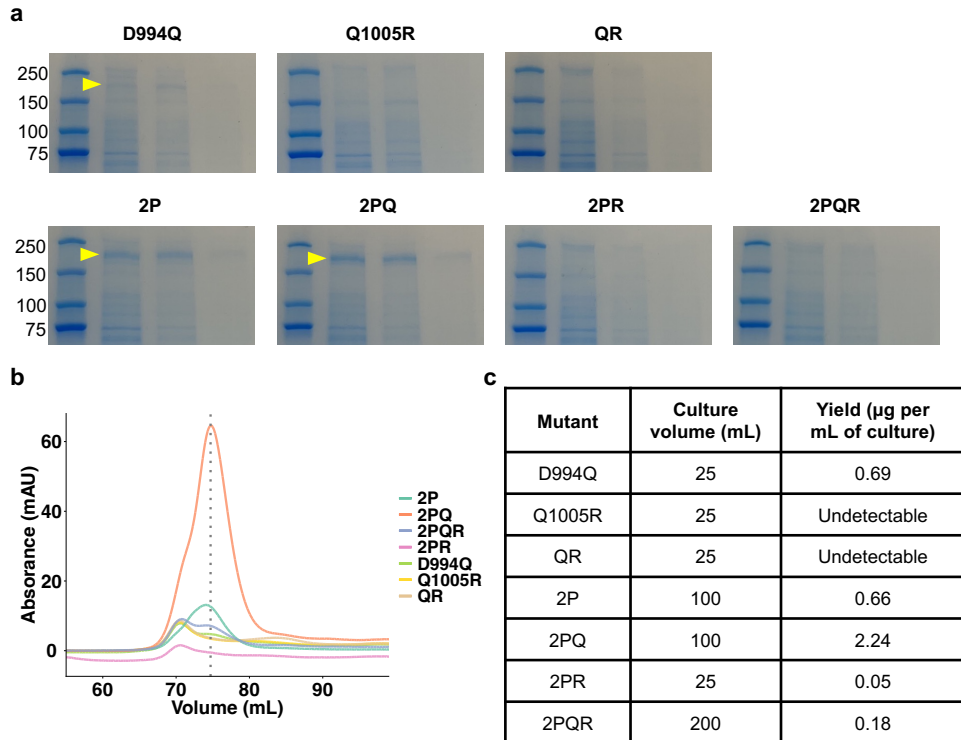

**Fig. S7 | Purification of S ectodomain mutants.** **a**, SDS-PAGE gels of soluble spike proteins after His-tag affinity purification. Molecular weights (in kDa) of protein standards are shown. Arrowheads point to the band corresponding to the size of a glycosylated S monomer (~180 kDa). Gels are representative of  $n = 2$  independent biological experiments. **b**, Chromatograms of soluble spike ectodomain mutants for biophysical characterization. Dotted line indicates the peak volume (~74 mL) corresponding to the size of a glycosylated spike trimer (~540 kDa). Fractions from 73 mL to 79 mL were collected and concentrated. **c**, Culture volume and yield for each mutant in **b**. Abbreviations for combinatorial mutations are as follows: QR, D994Q/Q1005R; 2P, K986P/V987P; 2PQ, K986P/V987P/D994Q; 2PR, K986P/V987P/Q1005R; 2PQR, K986P/V987P/D994Q/Q1005R. Source data are provided as a Source Data file.

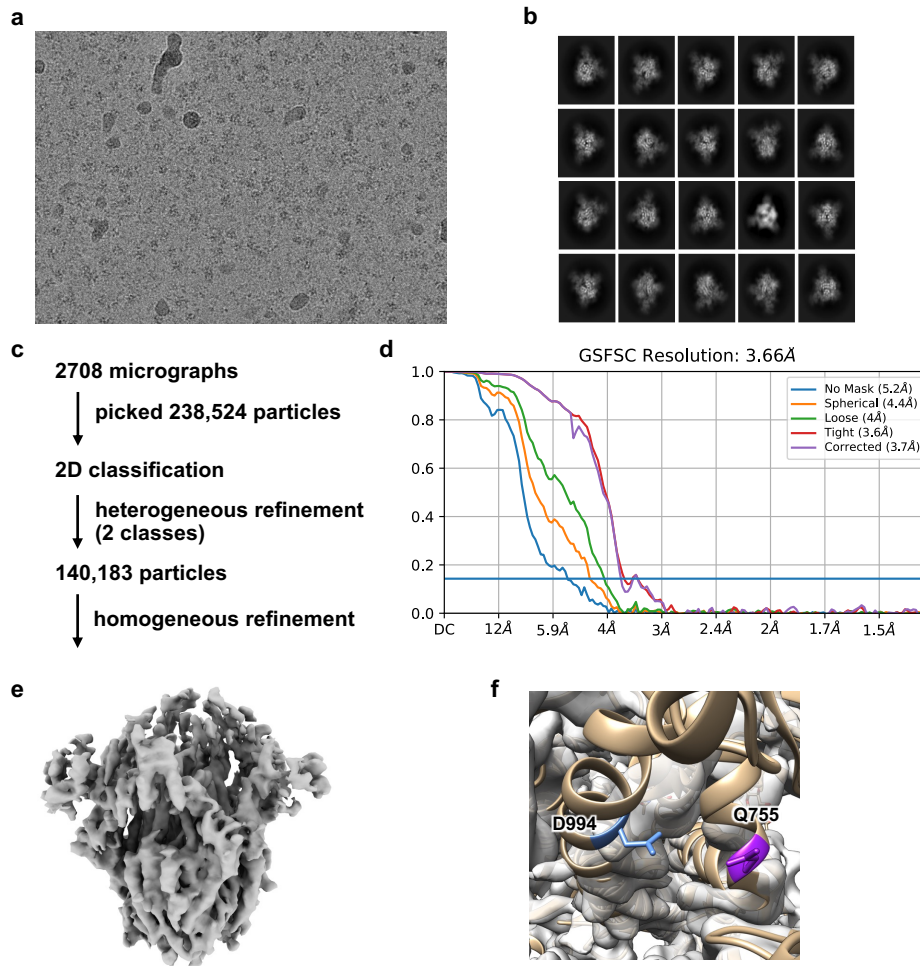

**Fig. S8 | Cryo-EM structure validation and analysis.** **a**, Representative micrograph for cryo-EM experiments. **b**, Exemplary 2D classes of soluble S with 2PQ mutations. **c**, Cryo-EM data processing workflow. Data collection and analysis was performed on cryoSPARC Live. **d**, Gold-standard Fourier shell correlation curve of soluble 2PQ ectodomain. **e**, Cryo-EM density map of soluble S with 2PQ mutations after homogeneous refinement. **f**, Fit of cryo-EM density map of soluble S with 2PQ mutations (in grey) to resolved structure of S with 2P mutations (PDB: 6VXX<sup>2</sup>). Helices in 2PQ as indicated by the electron density map are closer compared to those in 2P. Contour level of density map was set to 0.2 in UCSF Chimera.

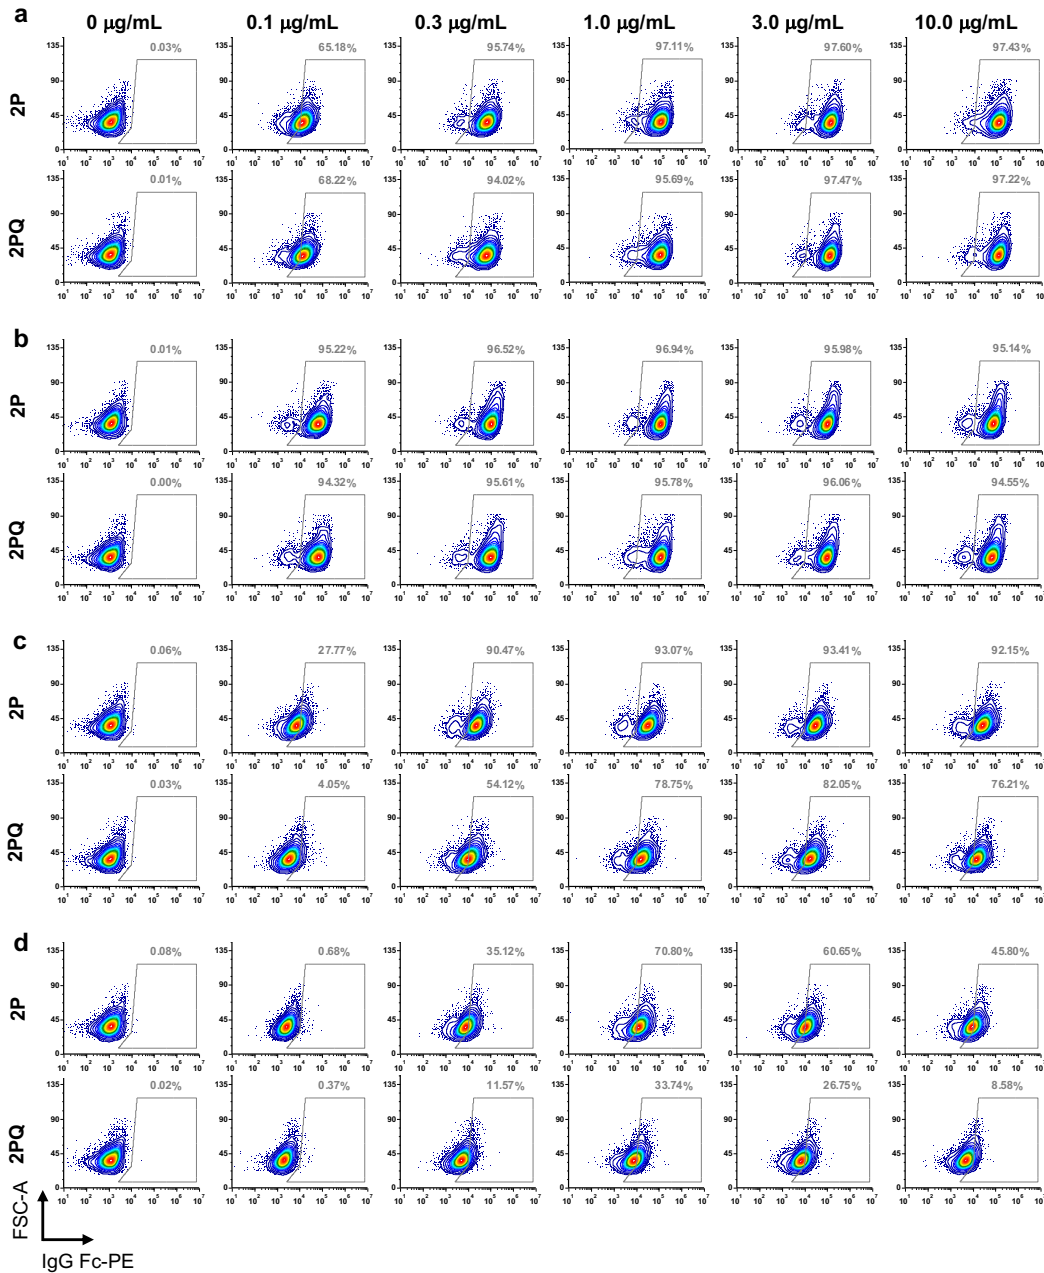

**Fig. S9 | Titration of SARS-CoV-2 S antibodies to membrane-bound S 2P and 2PQ.** a-d, Flow cytometry plots from titration of membrane-bound S bearing 2P or 2PQ mutations with S2M28<sup>3</sup>, an N-terminal domain antibody (a), CC12.3<sup>4</sup>, a receptor-binding domain antibody (b), COVA1-07<sup>5</sup>, a heptad repeat 1 antibody (c), and CC40.8<sup>1</sup>, a stem helix antibody (d). The concentrations of antibodies are indicated. Fig. S11a shows the gating strategy for this experiment.

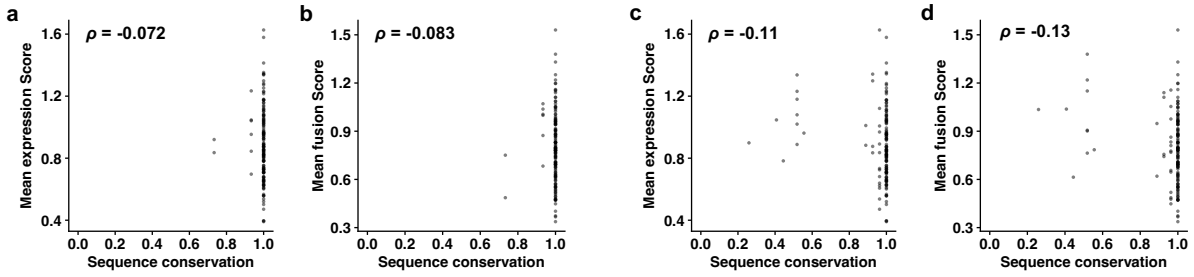

**Fig. S10 | Sequence conservation analysis of S2 HR1 and CH mutations.** **a,b**, Plots of mean expression score **(a)** and mean fusion score **(b)** against natural frequency in HR1 and CH of major SARS-CoV-2 variants (**Table S1**). **c,d**, Plots of mean expression score **(c)** and mean fusion score **(d)** against sequence conservation of the S2 HR1 and CH regions of related betacoronaviruses listed in **Table S7**. Spearman correlation coefficients,  $\rho$ , are shown in **a-d**. Source data are provided as a Source Data file.



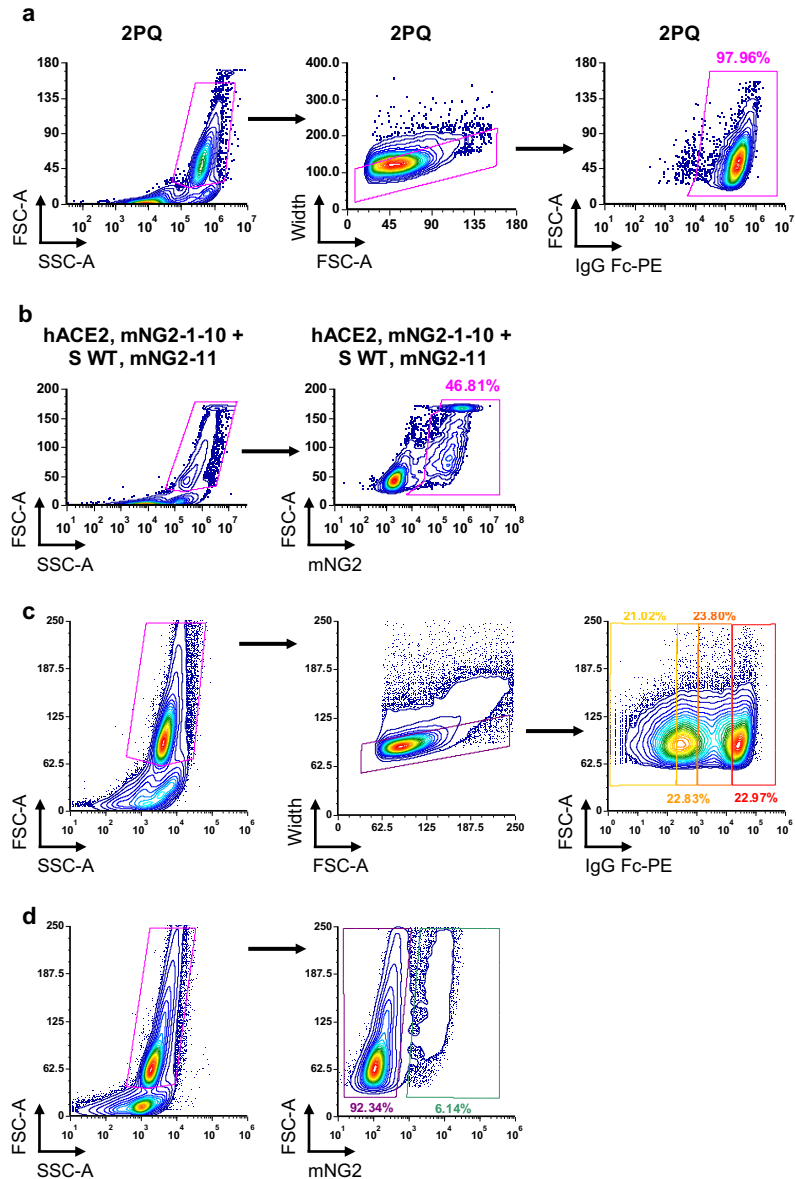

**Fig. S11 | Gating strategies for flow cytometry and fluorescence activated cell sorting (FACS).** **a**, Gating strategy used for flow cytometry to assess surface expression of S via PE fluorescence. **b**, Gating strategy used for flow cytometry to determine fusion of hACE2- and S-expressing cells via mNG2 fluorescence. **c**, Gating strategy used for FACS to sort the DMS library of S-expressing cells based on levels of PE fluorescence. **d**, Gating strategy used for FACS to sort the co-culture of the DMS library of S-expressing cells and hACE2-expressing cells at 3 hours post-mixing, based on presence or absence of mNG2 fluorescence.

**SUPPLEMENTARY TABLES**

**Table S1.** Mutations that are included in our DMS library (residues 883 to 1034) and also found in SARS-CoV-2 variants of concern and variants of interest.

| <b>Variants of concern</b>               |                     |                                                             |
|------------------------------------------|---------------------|-------------------------------------------------------------|
| <b>PANGO Lineage</b>                     | <b>Mutations</b>    | <b>GenBank Reference</b>                                    |
| Alpha<br>(B.1.1.7)                       | S982A               | MZ344997.1                                                  |
| Beta<br>(B.1.351)                        | -                   | MW598419.1                                                  |
| Gamma<br>(P.1)                           | T1027I              | MZ169911.1                                                  |
| Delta<br>(B.1.617.2)                     | D950N               | MZ359841.1                                                  |
| Omicron<br>(B.1.1.529: BA.1)             | Q954H, N969K, L981F | OL672836.1                                                  |
| Omicron<br>(B.1.1.529: BA.2, BA.4, BA.5) | Q954H, N969K        | OM685375.1 (BA.2)<br>ON373214.1 (BA.4)<br>ON249995.1 (BA.5) |
| <b>Variants of interest</b>              |                     |                                                             |
| <b>PANGO Lineage</b>                     | <b>Mutations</b>    | <b>GenBank Reference</b>                                    |
| Epsilon<br>(B.1.427, B.1.429)            | -                   | MW453103.1                                                  |
| Zeta<br>(P.2)                            | -                   | MW523796.1                                                  |
| Eta<br>(B.1.525)                         | F888L               | MW560924.1                                                  |
| Iota<br>(B.1.526)                        | -                   | MW643362.1                                                  |
| Kappa<br>(B.1.617.1)                     | -                   | MW966601.1                                                  |
| Lambda<br>(C.37)                         | -                   | MW850639.1                                                  |
| Mu<br>(B.1.621)                          | D950N               | EPI_ISL_1220045<br>(GISAID)                                 |

**Table S2.** Primers used for PCR-based site directed mutagenesis (QuikChange) to generate mutations. The plasmid backbone used was attB-S-mNG2-11.

| <b>Primer</b> | <b>Sequence (5' to 3')</b>            |
|---------------|---------------------------------------|
| T961F-F       | GCACTGAACTTCCTGGTCAAGCAGCTGTCC        |
| T961F-R       | CAGCTGCTTGACCAGGAAGTTCAGTGCCTGGGC     |
| K986P-F       | CTGAGCAGACTGGACCCGGTGGAAAGCCGAGGTGCAG |
| K986P-R       | CTGCACCTCGGCTTCCACCGGGTCCAGTCTGCTCAG  |
| V987P-F       | CTGAGCAGACTGGACAAGCCGGAAGCCGAGGTGCAG  |
| V987P-R       | CTGCACCTCGGCTTCCGGCTTGTCCAGTCTGCTCAG  |
| D994E-F       | CGAGGTGCAGATCGAGAGACTGATCACCGGAAG     |
| D994E-R       | CTTCCGGTGATCAGTCTCTCGATCTGCACCTCGGCT  |
| D994Q-F       | GCCGAGGTGCAGATCCAGAGACTGATCACCGGAAG   |
| D994Q-R       | CTTCCGGTGATCAGTCTCTGGATCTGCACCTCGGCT  |
| Q1005R-F      | GGCTGCAGTCCCTGCGGACCTACGTTACCCAG      |
| Q1005R-R      | CTGGGTAACGTAGGTCCGCAGGGACTGCAGCC      |
| K986P/V987P-F | CTGAGCAGACTGGACCCGCCGGAAGCCGAGGTGCAG  |
| K986P/V987P-R | CTGCACCTCGGCTTCCGGCGGGTCCAGTCTGCTCAG  |

**Table S3.** Cassette primers to generate the DMS library.

| <b>Primer</b> | <b>Sequence (5' to 3')</b>                                        |
|---------------|-------------------------------------------------------------------|
| Cassette1_1   | GCCCTGCTGGCCGGCACAATCNNKAGTGGTTGGACATTTGGAGCTGG<br>CGCCGCTCTGCAG  |
| Cassette1_2   | GCCCTGCTGGCCGGCACAATCACCNNKGGCTGGACCTTTGGAGCTG<br>GCGCCGCTCTGCAG  |
| Cassette1_3   | GCCCTGCTGGCCGGCACAATCACCAGCNNKTGGACATTCGGAGCTG<br>GCGCCGCTCTGCAG  |
| Cassette1_4   | GCCCTGCTGGCCGGCACAATCACAAGCGGTNNKACCTTTGGAGCTGG<br>CGCCGCTCTGCAG  |
| Cassette1_5   | GCCCTGCTGGCCGGCACAATCACAAGTGGCTGGNNKTTTCGGAGCTG<br>GCGCCGCTCTGCAG |
| Cassette1_6   | GCCCTGCTGGCCGGCACAATCACCAGCGGTTGGACNNKGGTGCTG<br>GCGCCGCTCTGCAG   |
| Cassette1_7   | GCCCTGCTGGCCGGCACAATCACCAGCGGTTGGACATTTNNKGCAGG<br>CGCCGCTCTGCAG  |
| Cassette1_8   | GCCCTGCTGGCCGGCACAATCACCAGTGGTTGGACCTTCGGANNKG<br>GCGCCGCTCTGCAG  |
| Cassette2_1   | AGCGGCTGGACATTTGGAGCTNNKGCAGCACTGCAGATCCCCTTTGC<br>TATGCAGATGGCC  |
| Cassette2_2   | AGCGGCTGGACATTTGGAGCTGGTNNKGCTCTCCAGATCCCCTTTGC<br>TATGCAGATGGCC  |
| Cassette2_3   | AGCGGCTGGACATTTGGAGCTGGTGCCNNKCTGCAAATCCCCTTTGC<br>TATGCAGATGGCC  |
| Cassette2_4   | AGCGGCTGGACATTTGGAGCTGGCGCAGCTNNKCAAATCCCCTTTGC<br>TATGCAGATGGCC  |
| Cassette2_5   | AGCGGCTGGACATTTGGAGCTGGCGCCGCACTCNNKATCCCCTTTGC<br>TATGCAGATGGCC  |
| Cassette2_6   | AGCGGCTGGACATTTGGAGCTGGTGCAGCACTCCAANNKCCCTTTGC<br>TATGCAGATGGCC  |
| Cassette2_7   | AGCGGCTGGACATTTGGAGCTGGTGCAGCTCTGCAAATANNKTTTGC<br>TATGCAGATGGCC  |
| Cassette2_8   | AGCGGCTGGACATTTGGAGCTGGTGCCGCACTCCAGATACCCNNKGC<br>TATGCAGATGGCC  |
| Cassette3_1   | GCCGCTCTGCAGATCCCCTTTNNKATGCAAATGGCATAACGGTTCAAC<br>GGCATCGGAGTG  |
| Cassette3_2   | GCCGCTCTGCAGATCCCCTTTGCANNKCAAATGGCCTATCGGTTCAAC<br>GGCATCGGAGTG  |
| Cassette3_3   | GCCGCTCTGCAGATCCCCTTTGCAATGNNKATGGCATATCGATTCAAC<br>GGCATCGGAGTG  |
| Cassette3_4   | GCCGCTCTGCAGATCCCCTTTGCTATGCAGNNKGCATATCGGTTCAAC<br>GGCATCGGAGTG  |
| Cassette3_5   | GCCGCTCTGCAGATCCCCTTTGCAATGCAAATGNNKTACCGATTAAAC<br>GGCATCGGAGTG  |

Cassette3\_6 GCCGCTCTGCAGATCCCCTTTGCTATGCAAATGGCCNNKCGATTCAAC  
GGCATCGGAGTG

Cassette3\_7 GCCGCTCTGCAGATCCCCTTTGCAATGCAGATGGCCTATNNKTTTAAC  
GGCATCGGAGTG

Cassette3\_8 GCCGCTCTGCAGATCCCCTTTGCTATGCAGATGGCATAACCGANNKAA  
CGGCATCGGAGTG

Cassette4\_1 ATGCAGATGGCCTACCGGTTCCNNKGGTATAGGAGTGACCCAGAATGT  
GCTGTACGAGAAC

Cassette4\_2 ATGCAGATGGCCTACCGGTTCAATNNKATCGGTGTGACCCAGAATGT  
GCTGTACGAGAAC

Cassette4\_3 ATGCAGATGGCCTACCGGTTCAACGGTNNKGGTGTAACCCAGAATGT  
GCTGTACGAGAAC

Cassette4\_4 ATGCAGATGGCCTACCGGTTCAATGGCATANNKGTAACCCAGAATGT  
GCTGTACGAGAAC

Cassette4\_5 ATGCAGATGGCCTACCGGTTCAACGGTATCGGANNKACACAGAATGT  
GCTGTACGAGAAC

Cassette4\_6 ATGCAGATGGCCTACCGGTTCAACGGCATAGGTGTGNNKCAGAATGT  
GCTGTACGAGAAC

Cassette4\_7 ATGCAGATGGCCTACCGGTTCAATGGTATCGGAGTAACCNKAATGT  
GCTGTACGAGAAC

Cassette4\_8 ATGCAGATGGCCTACCGGTTCAACGGCATCGGTGTAACACAGNNKGT  
GCTGTACGAGAAC

Cassette5\_1 GGCATCGGAGTGACCCAGAATNNKCTCTATGAGAACCAGAAGCTGAT  
CGCCAACCAGTTC

Cassette5\_2 GGCATCGGAGTGACCCAGAATGTANNKTACGAAAACCAGAAGCTGAT  
CGCCAACCAGTTC

Cassette5\_3 GGCATCGGAGTGACCCAGAATGTACTGNNKGAGAATCAGAAGCTGAT  
CGCCAACCAGTTC

Cassette5\_4 GGCATCGGAGTGACCCAGAATGTGCTCTACNNKAATCAGAAGCTGAT  
CGCCAACCAGTTC

Cassette5\_5 GGCATCGGAGTGACCCAGAATGTGCTGTATGAANNKCAGAAGCTGAT  
CGCCAACCAGTTC

Cassette5\_6 GGCATCGGAGTGACCCAGAATGTACTCTATGAAAATNNKAAGCTGATC  
GCCAACCAGTTC

Cassette5\_7 GGCATCGGAGTGACCCAGAATGTACTCTACGAGAACCAANNKCTGAT  
CGCCAACCAGTTC

Cassette5\_8 GGCATCGGAGTGACCCAGAATGTACTGTATGAGAACCAAAAGNNKAT  
CGCCAACCAGTTC

Cassette6\_1 CTGTACGAGAACCAGAAGCTGNNKGCAAATCAGTTCAACAGCGCCAT  
CGGCAAGATCCAG

Cassette6\_2 CTGTACGAGAACCAGAAGCTGATANNKAACCAATTCAACAGCGCCATC  
GGCAAGATCCAG

Cassette6\_3 CTGTACGAGAACCAGAAGCTGATCGCANNKCAATTTAACAGCGCCATC  
GGCAAGATCCAG

Cassette6\_4 CTGTACGAGAACCAGAAGCTGATAGCCAATNNKTTTAAACAGCGCCATC  
GGCAAGATCCAG

Cassette6\_5 CTGTACGAGAACCAGAAGCTGATCGCAAACCAGNNKAATAGCGCCAT  
CGGCAAGATCCAG

Cassette6\_6 CTGTACGAGAACCAGAAGCTGATCGCCAATCAATTCNNKAGCGCCAT  
CGGCAAGATCCAG

Cassette6\_7 CTGTACGAGAACCAGAAGCTGATAGCAAACCAGTTTAAACNNKGCCATC  
GGCAAGATCCAG

Cassette6\_8 CTGTACGAGAACCAGAAGCTGATCGCCAACCAATTTAATAGCNNKATC  
GGCAAGATCCAG

Cassette7\_1 GCCAACCAAGTTCAACAGCGCCNNKGGTAAAATCCAGGACAGCCTGAG  
CAGCACAGCAAGC

Cassette7\_2 GCCAACCAAGTTCAACAGCGCCATANNKAAGATACAGGACAGCCTGAG  
CAGCACAGCAAGC

Cassette7\_3 GCCAACCAAGTTCAACAGCGCCATCGGTNNKATACAAGACAGCCTGAG  
CAGCACAGCAAGC

Cassette7\_4 GCCAACCAAGTTCAACAGCGCCATAGGCAAANNKCAAGACAGCCTGAG  
CAGCACAGCAAGC

Cassette7\_5 GCCAACCAAGTTCAACAGCGCCATCGGTAAGATCNNKGATAGCCTGAG  
CAGCACAGCAAGC

Cassette7\_6 GCCAACCAAGTTCAACAGCGCCATCGGCAAATACAGNNKAGCCTGAG  
CAGCACAGCAAGC

Cassette7\_7 GCCAACCAAGTTCAACAGCGCCATAGGTAAGATCCAAGACNNKCTGAG  
CAGCACAGCAAGC

Cassette7\_8 GCCAACCAAGTTCAACAGCGCCATCGGCAAGATACAAGATAGCNNKAG  
CAGCACAGCAAGC

Cassette8\_1 GGCAAGATCCAGGACAGCCTGNNKAGTACCGCAAGCGCCCTGGGAA  
AGCTGCAGGACGTG

Cassette8\_2 GGCAAGATCCAGGACAGCCTGAGTNNKACAGCCAGCGCCCTGGGAA  
AGCTGCAGGACGTG

Cassette8\_3 GGCAAGATCCAGGACAGCCTGAGCAGCNNKGCCAGTGCCCTGGGAA  
AGCTGCAGGACGTG

Cassette8\_4 GGCAAGATCCAGGACAGCCTGAGCAGCACNNKAGCGCACTGGGAA  
AGCTGCAGGACGTG

Cassette8\_5 GGCAAGATCCAGGACAGCCTGAGCAGTACAGCANNKGCCTGGGAAA  
GCTGCAGGACGTG

Cassette8\_6 GGCAAGATCCAGGACAGCCTGAGTAGCACCGCAAGTNNKCTGGGAAA  
GCTGCAGGACGTG

Cassette8\_7 GGCAAGATCCAGGACAGCCTGAGTAGTACCGCCAGTGCCNNKGGAAA  
GCTGCAGGACGTG

Cassette8\_8 GGCAAGATCCAGGACAGCCTGAGTAGTACAGCAAGTGCCCTGNNKAA  
GCTGCAGGACGTG

Cassette9\_1 AGCACAGCAAGCGCCCTGGGANNKCTCCAAGACGTGGTCAACCAGAA  
TGCCCAGGCACTG

Cassette9\_2 AGCACAGCAAGCGCCCTGGGAAAANNKCAGGATGTGGTCAACCAGAA  
TGCCCAGGCACTG

Cassette9\_3 AGCACAGCAAGCGCCCTGGGAAAGCTCNNKGATGTAGTCAACCAGAA  
TGCCCAGGCACTG

Cassette9\_4 AGCACAGCAAGCGCCCTGGGAAAAGCTGCAANNKGTAGTCAACCAGAA  
TGCCCAGGCACTG

Cassette9\_5 AGCACAGCAAGCGCCCTGGGAAAGCTCCAGGACNNKGTAACCAGAA  
TGCCCAGGCACTG

Cassette9\_6 AGCACAGCAAGCGCCCTGGGAAAGCTGCAAGATGTGNNKAACCAGAA  
TGCCCAGGCACTG

Cassette9\_7 AGCACAGCAAGCGCCCTGGGAAAAGCTCCAGGACGTAGTCNNKCAGAA  
TGCCCAGGCACTG

Cassette9\_8 AGCACAGCAAGCGCCCTGGGAAAGCTGCAAGACGTAGTAAACNNKAA  
TGCCCAGGCACTG

Cassette10\_1 CTGCAGGACGTGGTCAACCAGNNKGCACAAGCACTGAACACCCTGGT  
CAAGCAGCTGTCC

Cassette10\_2 CTGCAGGACGTGGTCAACCAGAACNNKCAGGCCCTGAACACCCTGGT  
CAAGCAGCTGTCC

Cassette10\_3 CTGCAGGACGTGGTCAACCAGAACGCCNNKGCACCTAACACCCTGGT  
CAAGCAGCTGTCC

Cassette10\_4 CTGCAGGACGTGGTCAACCAGAATGCACAGNNKCTAACACCCTGGT  
CAAGCAGCTGTCC

Cassette10\_5 CTGCAGGACGTGGTCAACCAGAATGCCAAGCCNNKAACACCCTGGT  
CAAGCAGCTGTCC

Cassette10\_6 CTGCAGGACGTGGTCAACCAGAACGCACAAGCCCTCNNKACCCTGGT  
CAAGCAGCTGTCC

Cassette10\_7 CTGCAGGACGTGGTCAACCAGAACGCACAGGCACTCAATNNKCTGGT  
CAAGCAGCTGTCC

Cassette10\_8 CTGCAGGACGTGGTCAACCAGAACGCCAAGCACTGAATACCNNKGT  
CAAGCAGCTGTCC

Cassette11\_1 GCCCAGGCACTGAACACCCTGNNKAAACAAGTCTCCTCCAACCTTCGG  
CGCCATCAGCTCT

Cassette11\_2 GCCCAGGCACTGAACACCCTGGTANNKCAGCTCTCCTCCAACCTTCGG  
CGCCATCAGCTCT

Cassette11\_3 GCCCAGGCACTGAACACCCTGGTAAAGNNKCTGTCTTCCAACCTTCGG  
CGCCATCAGCTCT

Cassette11\_4 GCCCAGGCACTGAACACCCTGGTCAAACAGNNKTCTTCCAACCTTCGG  
CGCCATCAGCTCT

Cassette11\_5 GCCCAGGCACTGAACACCCTGGTCAAGCAACTCNNKTCCAACCTTCGG  
CGCCATCAGCTCT

Cassette11\_6 GCCCAGGCACTGAACACCCTGGTAAAACAAGTCTCTNNKAACTTCGG  
CGCCATCAGCTCT

Cassette11\_7 GCCCAGGCACTGAACACCCTGGTAAAGCAACTCTCCTCTNNKTTTCGG  
CGCCATCAGCTCT

Cassette11\_8 GCCCAGGCACTGAACACCCTGGTAAAGCAGCTCTCTTCTAACNNKGG  
CGCCATCAGCTCT

Cassette12\_1 AAGCAGCTGTCCTCCAACCTTCNNKGCAATAAGCTCTGTGCTGAACGAT  
ATCCTGAGCAGA

Cassette12\_2 AAGCAGCTGTCCTCCAACCTTCGGTNNKATCAGTTCTGTGCTGAACGAT  
ATCCTGAGCAGA

Cassette12\_3 AAGCAGCTGTCCTCCAACCTTCGGTGCCNNKAGCTCGGTGCTGAACGA  
TATCCTGAGCAGA

Cassette12\_4 AAGCAGCTGTCCTCCAACCTTCGGCGCAATCNNKTCGGTGCTGAACGA  
TATCCTGAGCAGA

Cassette12\_5 AAGCAGCTGTCCTCCAACCTTCGGCGCCATAAGTNNKGTGCTGAACGA  
TATCCTGAGCAGA

Cassette12\_6 AAGCAGCTGTCCTCCAACCTTCGGTGCAATAAGTTCGNNKCTGAACGAT  
ATCCTGAGCAGA

Cassette12\_7 AAGCAGCTGTCCTCCAACCTTCGGTGCAATCAGCTCTGTANNKAACGAT  
ATCCTGAGCAGA

Cassette12\_8 AAGCAGCTGTCCTCCAACCTTCGGTGCCATCAGTTCGGTACTGNNKGAT  
ATCCTGAGCAGA

Cassette13\_1 GCCATCAGCTCTGTGCTGAACNNKATACTCAGCAGACTGGACAAGGT  
GGAAGCCGAGGTG

Cassette13\_2 GCCATCAGCTCTGTGCTGAACGACNNKCTGAGTAGACTGGACAAGGT  
GGAAGCCGAGGTG

Cassette13\_3 GCCATCAGCTCTGTGCTGAACGATATCNNKAGTAGGCTGGACAAGGT  
GGAAGCCGAGGTG

Cassette13\_4 GCCATCAGCTCTGTGCTGAACGATATCCTCNNKAGACTCGACAAGGT  
GGAAGCCGAGGTG

Cassette13\_5 GCCATCAGCTCTGTGCTGAACGATATACTGAGCNNKCTCGACAAGGT  
GGAAGCCGAGGTG

Cassette13\_6 GCCATCAGCTCTGTGCTGAACGACATCCTCAGCAGGNNKGACAAGGT  
GGAAGCCGAGGTG

Cassette13\_7 GCCATCAGCTCTGTGCTGAACGACATACTCAGTAGGCTGNNKAAGGT  
GGAAGCCGAGGTG

Cassette13\_8 GCCATCAGCTCTGTGCTGAACGACATACTGAGCAGGCTGGACNNKGT  
GGAAGCCGAGGTG

Cassette14\_1 ATCCTGAGCAGACTGGACAAGNNKGAGGCAGAGGTGCAGATCGACA  
GACTGATCACCGGA

Cassette14\_2 ATCCTGAGCAGACTGGACAAGGTANNKGCCGAAGTGCAGATCGACAG  
ACTGATCACCGGA

Cassette14\_3 ATCCTGAGCAGACTGGACAAGGTAGAANNKGAGGTACAGATCGACAG  
ACTGATCACCGGA

Cassette14\_4 ATCCTGAGCAGACTGGACAAGGTGGAGGCCNNKGTACAGATCGACAG  
ACTGATCACCGGA

Cassette14\_5 ATCCTGAGCAGACTGGACAAGGTGGAAGCAGAANNKCAGATCGACAG  
ACTGATCACCGGA



Cassette14\_6 ATCCTGAGCAGACTGGACAAGGTAGAGGCAGAAGTANNKATCGACAG  
ACTGATCACCGGA

Cassette14\_7 ATCCTGAGCAGACTGGACAAGGTAGAGGCCGAGGTACAANNKGACAG  
ACTGATCACCGGA

Cassette14\_8 ATCCTGAGCAGACTGGACAAGGTAGAAGCAGAGGTGCAAATCNNKAG  
ACTGATCACCGGA

Cassette15\_1 GAAGCCGAGGTGCAGATCGACNNKCTCATAACCGGAAGGCTGCAGTC  
CCTGCAGACCTAC

Cassette15\_2 GAAGCCGAGGTGCAGATCGACAGGNNKATCACAGGAAGGCTGCAGT  
CCCTGCAGACCTAC

Cassette15\_3 GAAGCCGAGGTGCAGATCGACAGGCTGNNKACCGGTAGGCTGCAGT  
CCCTGCAGACCTAC

Cassette15\_4 GAAGCCGAGGTGCAGATCGACAGACTCATCNNKGGTAGGCTGCAGTC  
CCTGCAGACCTAC

Cassette15\_5 GAAGCCGAGGTGCAGATCGACAGACTGATAACANNKAGGCTGCAGTC  
CCTGCAGACCTAC

Cassette15\_6 GAAGCCGAGGTGCAGATCGACAGGCTCATAACAGGTNNKCTGCAGTC  
CCTGCAGACCTAC

Cassette15\_7 GAAGCCGAGGTGCAGATCGACAGGCTCATCACCGGTAGANNKCAGTC  
CCTGCAGACCTAC

Cassette15\_8 GAAGCCGAGGTGCAGATCGACAGGCTGATCACCGGAAGACTGNNKTC  
CCTGCAGACCTAC

Cassette16\_1 CTGATCACCGGAAGGCTGCAGNNKCTCCAAACCTACGTTACCCAGCA  
GCTGATCAGAGCC

Cassette16\_2 CTGATCACCGGAAGGCTGCAGTCTNNKCAGACATACGTTACCCAGCA  
GCTGATCAGAGCC

Cassette16\_3 CTGATCACCGGAAGGCTGCAGTCTCTGNNKACCTATGTTACCCAGCA  
GCTGATCAGAGCC

Cassette16\_4 CTGATCACCGGAAGGCTGCAGTCCCTCCAGNNKTATGTTACCCAGCA  
GCTGATCAGAGCC

Cassette16\_5 CTGATCACCGGAAGGCTGCAGTCCCTGCAAACANNKGTTACCCAGCA  
GCTGATCAGAGCC

Cassette16\_6 CTGATCACCGGAAGGCTGCAGTCTCTCAAACATATNNKACCCAGCA  
GCTGATCAGAGCC

Cassette16\_7 CTGATCACCGGAAGGCTGCAGTCTCTCCAGACCTATGTANNKCAGCA  
GCTGATCAGAGCC

Cassette16\_8 CTGATCACCGGAAGGCTGCAGTCTCTGCAAACCTACGTAACCNNKCA  
GCTGATCAGAGCC

Cassette17\_1 CTGCAGACCTACGTTACCCAGNNKCTCATAAGAGCCGCCGAGATTAG  
AGCCTCTGCCAAT

Cassette17\_2 CTGCAGACCTACGTTACCCAGCAANNKATCAGGGCCGCCGAGATTAG  
AGCCTCTGCCAAT

Cassette17\_3 CTGCAGACCTACGTTACCCAGCAACTGNNKAGAGCAGCCGAGATTAG  
AGCCTCTGCCAAT

Cassette17\_4 CTGCAGACCTACGTTACCCAGCAGCTCATCANNKGCAGCCGAGATTAG  
AGCCTCTGCCAAT

Cassette17\_5 CTGCAGACCTACGTTACCCAGCAGCTGATAAGGNNKGCCGAGATTAG  
AGCCTCTGCCAAT

Cassette17\_6 CTGCAGACCTACGTTACCCAGCAACTCATAAGGGCANNKGCAGATTAG  
AGCCTCTGCCAAT

Cassette17\_7 CTGCAGACCTACGTTACCCAGCAACTCATCAGAGCAGCANNKATTAGA  
GCCTCTGCCAAT

Cassette17\_8 CTGCAGACCTACGTTACCCAGCAACTGATCAGGGCAGCAGAGNNKAG  
AGCCTCTGCCAAT

Cassette18\_1 CTGATCAGAGCCGCCGAGATTNNKGCATCGGCCAATCTGGCCGCCAC  
CAAGATGTCTGAG

Cassette18\_2 CTGATCAGAGCCGCCGAGATTAGGNNKTCTGCAAATCTGGCCGCCAC  
CAAGATGTCTGAG

Cassette18\_3 CTGATCAGAGCCGCCGAGATTAGGGCCNNKGCCAACCTGGCCGCCA  
CCAAGATGTCTGAG

Cassette18\_4 CTGATCAGAGCCGCCGAGATTAGAGCATCTNNKAACCTGGCCGCCAC  
CAAGATGTCTGAG

Cassette18\_5 CTGATCAGAGCCGCCGAGATTAGAGCCTCGGCANNKCTGGCCGCCA  
CCAAGATGTCTGAG

Cassette18\_6 CTGATCAGAGCCGCCGAGATTAGGGCATCGGCAAACNNKGCCGCCA  
CCAAGATGTCTGAG

Cassette18\_7 CTGATCAGAGCCGCCGAGATTAGGGCATCTGCCAACCTCANNKGCCAC  
CAAGATGTCTGAG

Cassette18\_8 CTGATCAGAGCCGCCGAGATTAGGGCCTCTGCAAACCTCGCCNNKAC  
CAAGATGTCTGAG

Cassette19\_1 GCCTCTGCCAATCTGGCCGCCNNKAAAATGTCGGAGTGTGTGCTGGG  
CCAGAGCAAGAGA

Cassette19\_2 GCCTCTGCCAATCTGGCCGCCACANNKATGTCTGAATGTGTGCTGGG  
CCAGAGCAAGAGA

Cassette19\_3 GCCTCTGCCAATCTGGCCGCCACCAAGNNKTCGGAATGTGTGCTGGG  
CCAGAGCAAGAGA

Cassette19\_4 GCCTCTGCCAATCTGGCCGCCACAAAATGNNKGAATGCGTGCTGGG  
CCAGAGCAAGAGA

Cassette19\_5 GCCTCTGCCAATCTGGCCGCCACAAAGATGTCGNNKTGCGTGCTGGG  
CCAGAGCAAGAGA

Cassette19\_6 GCCTCTGCCAATCTGGCCGCCACCAAGATGTCTGAANNKGTACTGGG  
CCAGAGCAAGAGA

Cassette19\_7 GCCTCTGCCAATCTGGCCGCCACAAAATGTCTGAGTGCCNNKCTGGG  
CCAGAGCAAGAGA

Cassette19\_8 GCCTCTGCCAATCTGGCCGCCACCAAGATGTCGGAGTGTGTANNKGG  
CCAGAGCAAGAGA

|                    |                        |
|--------------------|------------------------|
| Cassette1_Rprimer  | GATTGTGCCGGCCAGCAGGGC  |
| Cassette2_Rprimer  | AGCTCCAAATGTCCAGCCGCT  |
| Cassette3_Rprimer  | AAAGGGGATCTGCAGAGCGGC  |
| Cassette4_Rprimer  | GAACCGGTAGGCCATCTGCAT  |
| Cassette5_Rprimer  | ATTCTGGGTCACTCCGATGCC  |
| Cassette6_Rprimer  | CAGCTTCTGGTTCTCGTACAG  |
| Cassette7_Rprimer  | GGCGCTGTTGAACTGGTTGGC  |
| Cassette8_Rprimer  | CAGGCTGTCCTGGATCTTGCC  |
| Cassette9_Rprimer  | TCCCAGGGCGCTTGCTGTGCT  |
| Cassette10_Rprimer | CTGGTTGACCACGTCCTGCAG  |
| Cassette11_Rprimer | CAGGGTGTTCAAGTGCCTGGGC |
| Cassette12_Rprimer | GAAGTTGGAGGACAGCTGCTT  |
| Cassette13_Rprimer | G TTCAGCACAGAGCTGATGGC |
| Cassette14_Rprimer | CTTGTCCAGTCTGCTCAGGAT  |
| Cassette15_Rprimer | GTCGATCTGCACCTCGGCTTC  |
| Cassette16_Rprimer | CTGCAGCCTTCCGGTGATCAG  |
| Cassette17_Rprimer | CTGGGTAACGTAGGTCTGCAG  |
| Cassette18_Rprimer | AATCTCGGCGGCTCTGATCAG  |
| Cassette19_Rprimer | GGCGGCCAGATTGGCAGAGGC  |

**Table S4.** Numbers of cells collected per bin in expression sorting.

| <b>Bin</b> | <b>Replicate 1</b> | <b>Replicate 2</b> | <b>Replicate 3</b> |
|------------|--------------------|--------------------|--------------------|
| Bin 0      | $8.03 \times 10^5$ | $1.30 \times 10^6$ | $1.70 \times 10^6$ |
| Bin 1      | $7.51 \times 10^5$ | $1.30 \times 10^6$ | $1.70 \times 10^6$ |
| Bin 2      | $7.70 \times 10^5$ | $1.30 \times 10^6$ | $1.70 \times 10^6$ |
| Bin 3      | $8.20 \times 10^5$ | $1.30 \times 10^6$ | $1.70 \times 10^6$ |

**Table S5.** Numbers of cells collected per bin in fusion sorting.

| <b>Bin</b>        | <b>Replicate 1</b> | <b>Replicate 2</b> |
|-------------------|--------------------|--------------------|
| mNG2 <sup>-</sup> | $3.53 \times 10^6$ | $5.51 \times 10^6$ |
| mNG2 <sup>+</sup> | $1.84 \times 10^5$ | $4.87 \times 10^5$ |

**Table S6.** *p*-values from Student's *t* test of expression and fusion scores between mutation types.

| <b>Expression</b> |                        |                        |                        |
|-------------------|------------------------|------------------------|------------------------|
|                   | Missense               | Nonsense               | Silent                 |
| Missense          |                        | $6.46 \times 10^{-60}$ | $2.93 \times 10^{-2}$  |
| Nonsense          | $6.46 \times 10^{-60}$ |                        | $3.80 \times 10^{-44}$ |
| Silent            | $2.93 \times 10^{-2}$  | $3.80 \times 10^{-44}$ |                        |
| <b>Fusion</b>     |                        |                        |                        |
|                   | Missense               | Nonsense               | Silent                 |
| Missense          |                        | $3.10 \times 10^{-34}$ | $7.08 \times 10^{-4}$  |
| Nonsense          | $3.10 \times 10^{-34}$ |                        | $1.44 \times 10^{-31}$ |
| Silent            | $7.08 \times 10^{-4}$  | $1.44 \times 10^{-31}$ |                        |

**Table S7.** Betacoronaviruses used for sequence conservation analysis.

| Accession ID     | Database | Name                                                                                                                                                                    |
|------------------|----------|-------------------------------------------------------------------------------------------------------------------------------------------------------------------------|
| gb_MN908947.3_   | GenBank  | Severe acute respiratory syndrome coronavirus 2 isolate Wuhan-Hu-1, complete genome                                                                                     |
| gb_MN996532.2_   | GenBank  | Bat coronavirus RaTG13, complete genome                                                                                                                                 |
| gb_MZ937000.1_   | GenBank  | Bat coronavirus isolate BANAL-20-52/Laos/2020, complete genome                                                                                                          |
| EPI_ISL_410543   | GISAID   | hCoV-19/pangolin/Guangxi/P3B/2017                                                                                                                                       |
| EPI_ISL_471465   | GISAID   | hCoV-19/pangolin/Guangdong/cDNA20-S/2019                                                                                                                                |
| gb_MZ937003.1_   | GenBank  | Bat coronavirus isolate BANAL-20-236/Laos/2020, complete genome                                                                                                         |
| gb_MZ937001.1_   | GenBank  | Bat coronavirus isolate BANAL-20-103/Laos/2020, complete genome                                                                                                         |
| gb_MG772933.1_   | GenBank  | Bat SARS-like coronavirus isolate bat-SL-CoVZC45, complete genome                                                                                                       |
| gb_MG772934.1_   | GenBank  | Bat SARS-like coronavirus isolate bat-SL-CoVZXC21, complete genome                                                                                                      |
| gb_KT444582.1_   | GenBank  | SARS-like coronavirus WIV16, complete genome                                                                                                                            |
| gb_DQ497008.1_   | GenBank  | SARS coronavirus strain MA-15, complete genome                                                                                                                          |
| gb_KC881007.1_   | GenBank  | Bat SARS-like coronavirus WIV1 spike protein (S) gene, complete cds                                                                                                     |
| gb_KY417144.1_   | GenBank  | Bat SARS-like coronavirus isolate Rs4084, complete genome                                                                                                               |
| gb_DQ412042.1_   | GenBank  | Bat SARS coronavirus Rf1, complete genome                                                                                                                               |
| gb_KJ473813.1_   | GenBank  | BtRf-BetaCoV/SX2013, complete genome                                                                                                                                    |
| gb_KJ473815.1_   | GenBank  | BtRs-BetaCoV/GX2013, complete genome                                                                                                                                    |
| gb_KF294457.1_   | GenBank  | Bat SARS-like coronavirus isolate Longquan-140 orf1ab polyprotein, spike glycoprotein, envelope protein, membrane protein, and nucleocapsid protein genes, complete cds |
| gb_DQ022305.2_   | GenBank  | Bat SARS coronavirus HKU3-1, complete genome                                                                                                                            |
| gb_DQ071615.1_   | GenBank  | Bat SARS coronavirus Rp3, complete genome                                                                                                                               |
| gb_FJ588686.1_   | GenBank  | Bat SARS CoV Rs672/2006, complete genome                                                                                                                                |
| gb_KJ473814.1_   | GenBank  | BtRs-BetaCoV/HuB2013, complete genome                                                                                                                                   |
| gb_KF569996.1_   | GenBank  | <i>Rhinolophus affinis</i> coronavirus isolate LYRa11, complete genome                                                                                                  |
| gb_KY352407.1_   | GenBank  | Severe acute respiratory syndrome-related coronavirus strain BtKY72, complete genome                                                                                    |
| ref_NC_014470.1_ | GenBank  | Bat coronavirus BM48-31/BGR/2008, complete genome                                                                                                                       |
| gb_MZ937004.1_   | GenBank  | Bat coronavirus isolate BANAL-20-247/Laos/2020, complete genome                                                                                                         |
| gb_MZ937002.1_   | GenBank  | Bat coronavirus isolate BANAL-20-116/Laos/2020, complete genome                                                                                                         |

|                |        |                                |
|----------------|--------|--------------------------------|
| EPI_ISL_412977 | GISAID | hCoV-19/bat/Yunnan/RmYN02/2019 |
|----------------|--------|--------------------------------|



**Table S8.** Cryo-EM data collection statistics.

|                                                     | 2PQ spike<br>(EMDB-29374) |
|-----------------------------------------------------|---------------------------|
| <b>Data collection and processing</b>               |                           |
| Magnification                                       | 130,000                   |
| Voltage (kV)                                        | 300                       |
| Electron exposure (e <sup>-</sup> /Å <sup>2</sup> ) | 50                        |
| Defocus range (μm)                                  | -0.8 to -1.5              |
| Pixel size (Å)                                      | 0.66                      |
| Symmetry imposed                                    | C1                        |
| Initial particle images (no.)                       | 238,524                   |
| Final particle images (no.)                         | 140,183                   |
| Map resolution (Å)                                  | 3.66                      |
| FSC threshold                                       | 0.143                     |
| Map resolution range (Å)                            | N/A                       |

## SUPPLEMENTARY REFERENCES

1. Zhou, P. *et al.* A human antibody reveals a conserved site on beta-coronavirus spike proteins and confers protection against SARS-CoV-2 infection. *Sci. Transl. Med.* **14**, eabi9215 (2022).
2. Walls, A. C. *et al.* Structure, function, and antigenicity of the SARS-CoV-2 spike glycoprotein. *Cell* **181**, 281-292. e6 (2020).
3. McCallum, M. *et al.* N-terminal domain antigenic mapping reveals a site of vulnerability for SARS-CoV-2. *Cell* **184**, 2332-2347.e16 (2021).
4. Yuan, M. *et al.* Structural basis of a shared antibody response to SARS-CoV-2. *Science* **369**, 1119-1123 (2020).
5. Claireaux, M. *et al.* A public antibody class recognizes an S2 epitope exposed on open conformations of SARS-CoV-2 spike. *Nat. Commun.* **13**, 4539 (2022).
